# Supplementary material
Source: publisher figshare collection journal article supplement (https://tandf.figshare.com/ndownloader/files/13205537)
Supplement: Supplementary file 1 [file 13205537]

# Supplemental Materials

## Activity Budgets

Here, we provide the activity budgets for one southern rockhopper (*Eudyptes chrysocome*) and three macaroni (*Eudyptes chrysolophus*) geriatric penguins before and after cataract surgery, and one year later. All of the penguins showed different behavioral responses to the cataract surgery (Figures S1-S4). Additionally, Tom greatly modified his habitat and substrate use after the surgery (Figures S5-S6).

# Figures

Figure S1. Activity budget (mean ± standard error) for Bruno (macaroni penguin) immediately before and after cataract surgery and one year-later. * Indicates a trend (0.01<p≤0.05) and ** indicates a significant difference (p≤0.01) for Wilcoxon signed-rank tests. A- Activity budget summary without standing to focus on less common behaviors. B- Standing percentage.

Figure S2. Activity budget (mean ± standard error) for Jaws (macaroni penguin) immediately before and after cataract surgery. * Indicates a trend (0.01<p≤0.05) and ** indicates a significant difference (p≤0.01) for Wilcoxon signed-rank tests. A- Activity budget summary without standing to focus on less common behaviors. B- Standing percentage. Data for this individual one year later were not available.

Figure S3. Activity budget (mean ± standard error) for Needles (macaroni penguin) immediately before and after cataract surgery and one year later. * Indicates a trend (0.01<p≤0.05) and ** indicates a significant difference (p≤0.01) for Wilcoxon signed-rank tests. A- Activity budget summary without standing to focus on less common behaviors. B- Standing percentage.

Figure S4. Activity budget (mean ± standard error) for Tom (rockhopper penguin) immediately before and after cataract surgery and one year later. * Indicates a trend (0.01<p≤0.05) and ** indicates a significant difference (p≤0.01) for Wilcoxon signed-rank tests. A- Activity budget summary without standing to focus on less common behaviors. B- Standing percentage.

Figure S5. Habitat use (mean ± standard error) for Tom (rockhopper penguin) immediately before and after cataract surgery and one year later. * Indicates a trend (0.01<p≤0.05) and ** indicates a significant difference (p≤0.01) for Wilcoxon signed-rank tests.

Figure S6. Substrate use (mean ± standard error) for Tom (rockhopper penguin) immediately before and after cataract surgery and one year later. * Indicates a trend (0.01<p≤0.05) and ** indicates a significant difference (p≤0.01) for Wilcoxon signed-rank tests.
